# Supplementary material for: Juan Rulfo y Mariano Azuela: ¿sucesión o superación?
Source: Royal Society of Chemistry journal article supplement (doi:10.1039/b907763d), 1985-01-01
Supplement: b907763d.pdf [file b907763d.pdf]

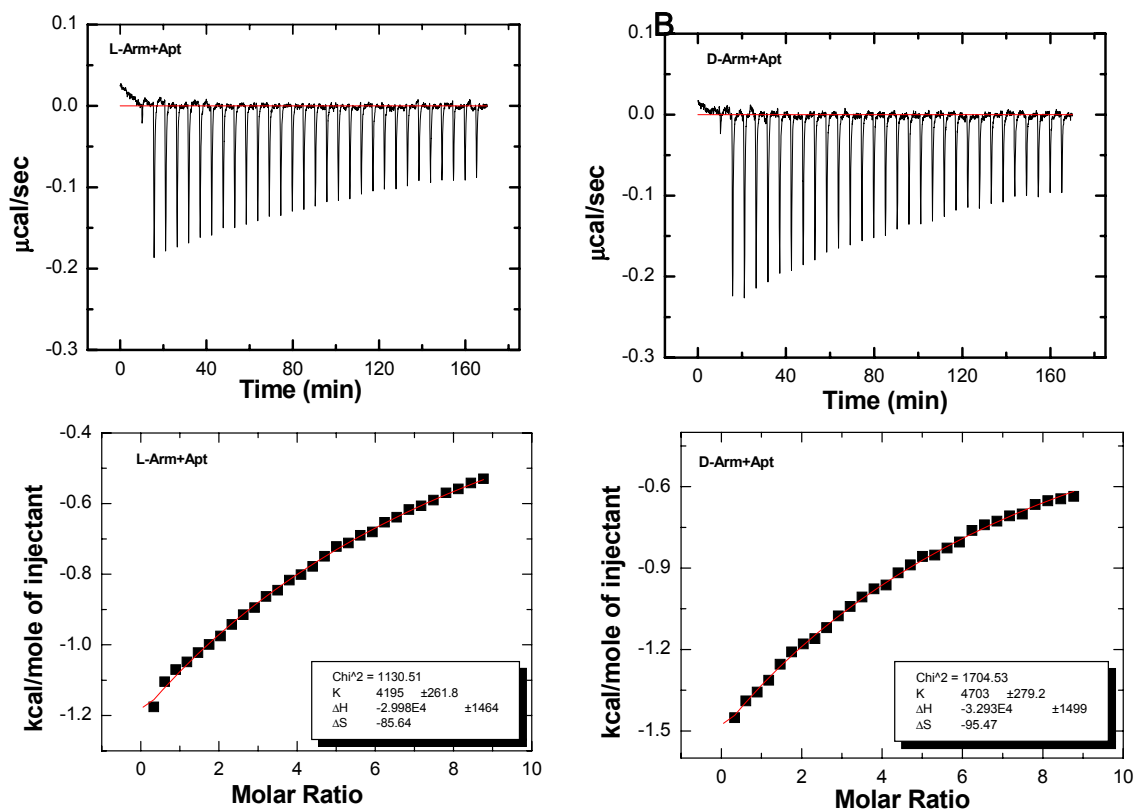

Figure S1. The ITC profiles at 10mM phosphate buffer, 25mM NaCl, pH 6.5, 20°C (A) L-Arm (B) D-Arm

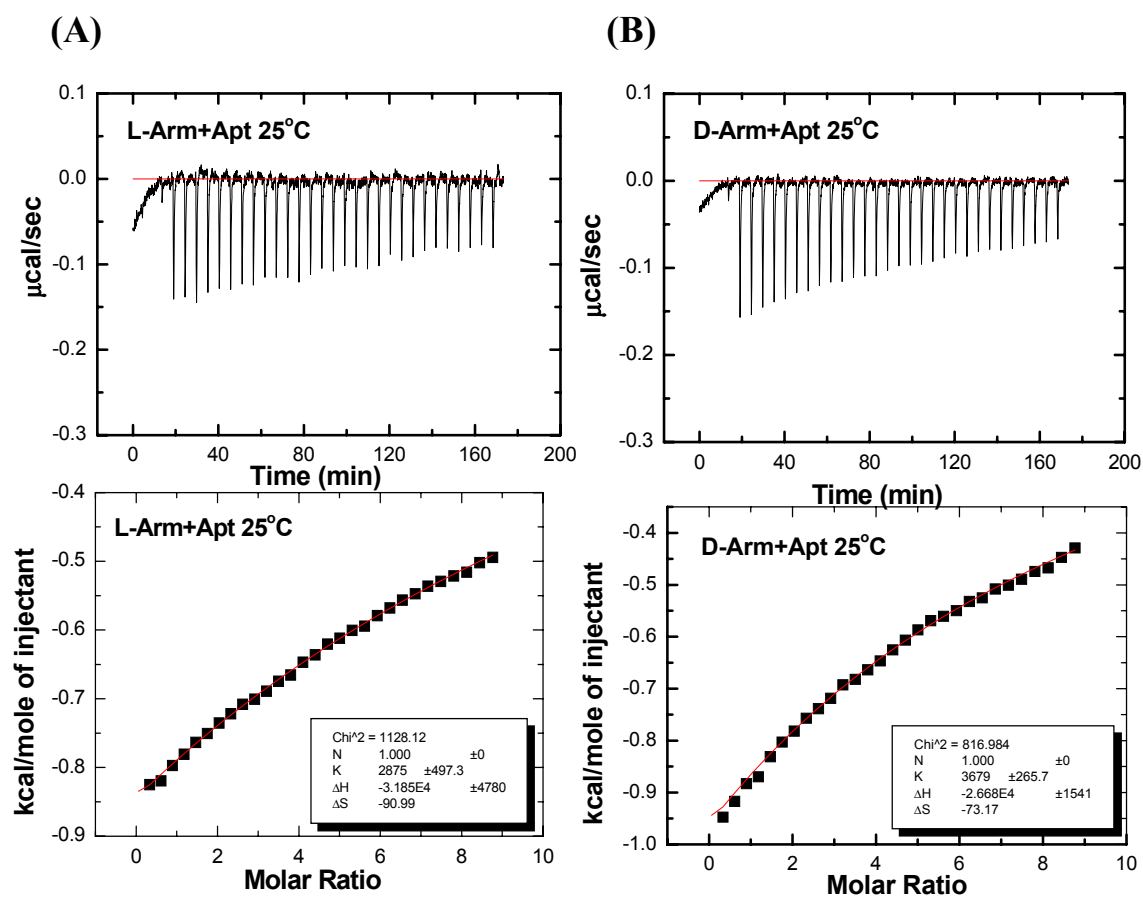

Figure S2. The ITC profiles at 10mM phosphate buffer, 25mM NaCl, pH 6.5, 25°C (A) L-Arm (B) D-Arm

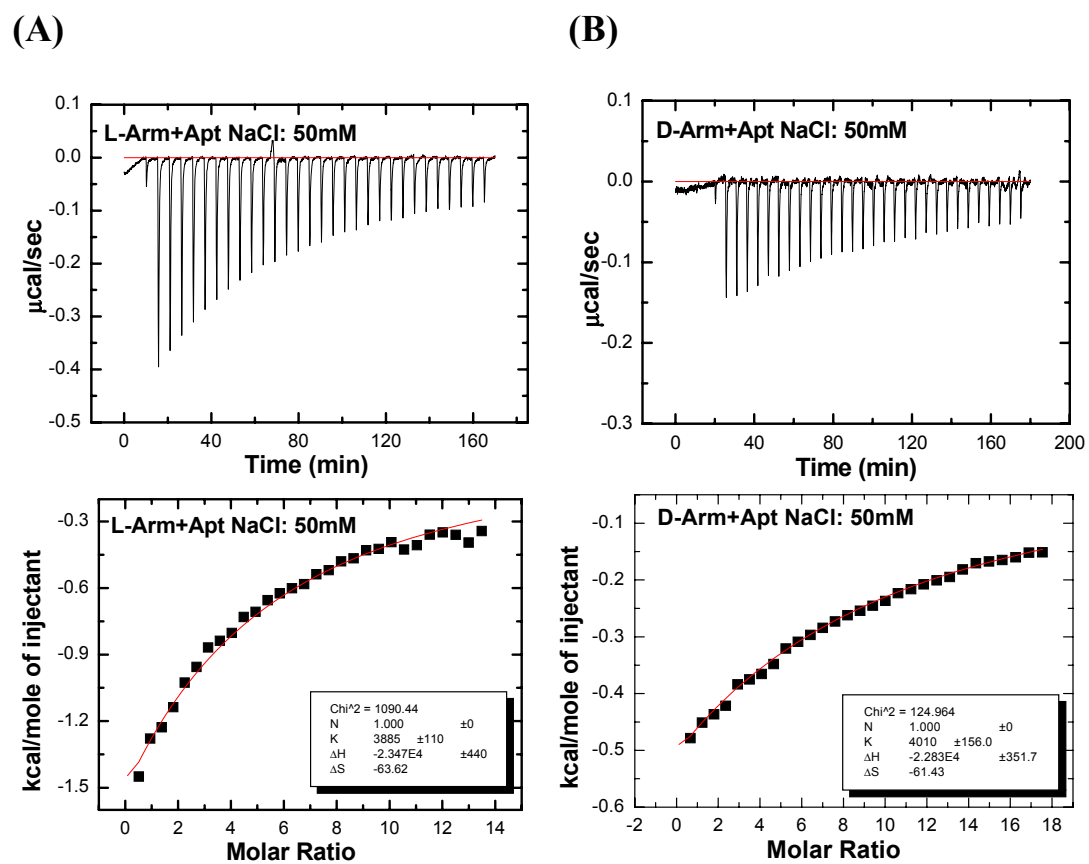

Figure S3. The ITC profiles at 10mM phosphate buffer, 50mM NaCl, pH 6.5, 20°C (A) L-Arm (B) D-Arm

(A)

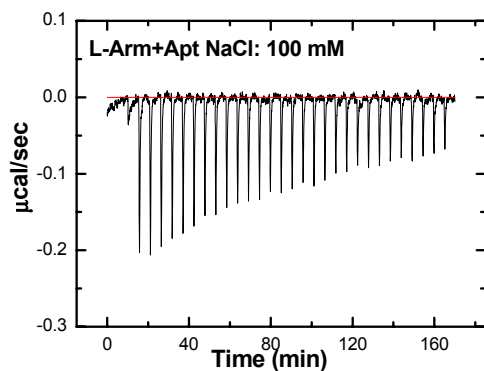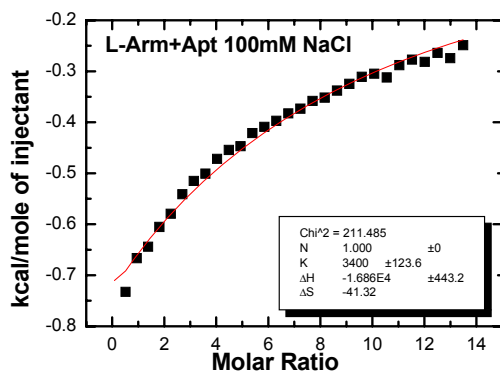

(B)

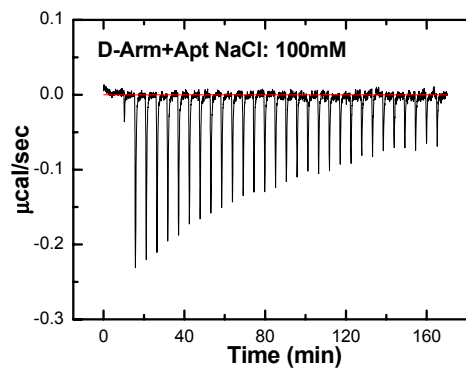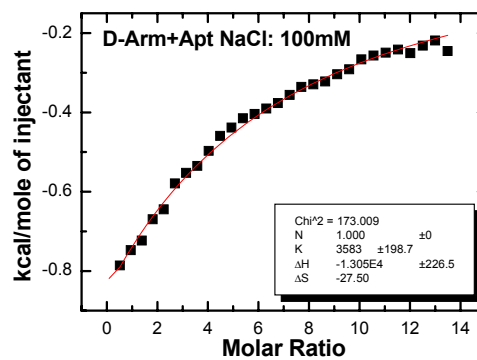

Figure S4. The ITC profiles at 10mM phosphate buffer, 100mM NaCl, pH 6.5, 20°C (A) L-Arm (B) D-Arm

Electronic Supplementary Material for PCCP

This Journal is © The Owner Societies 2009

**(A)**

**(B)**

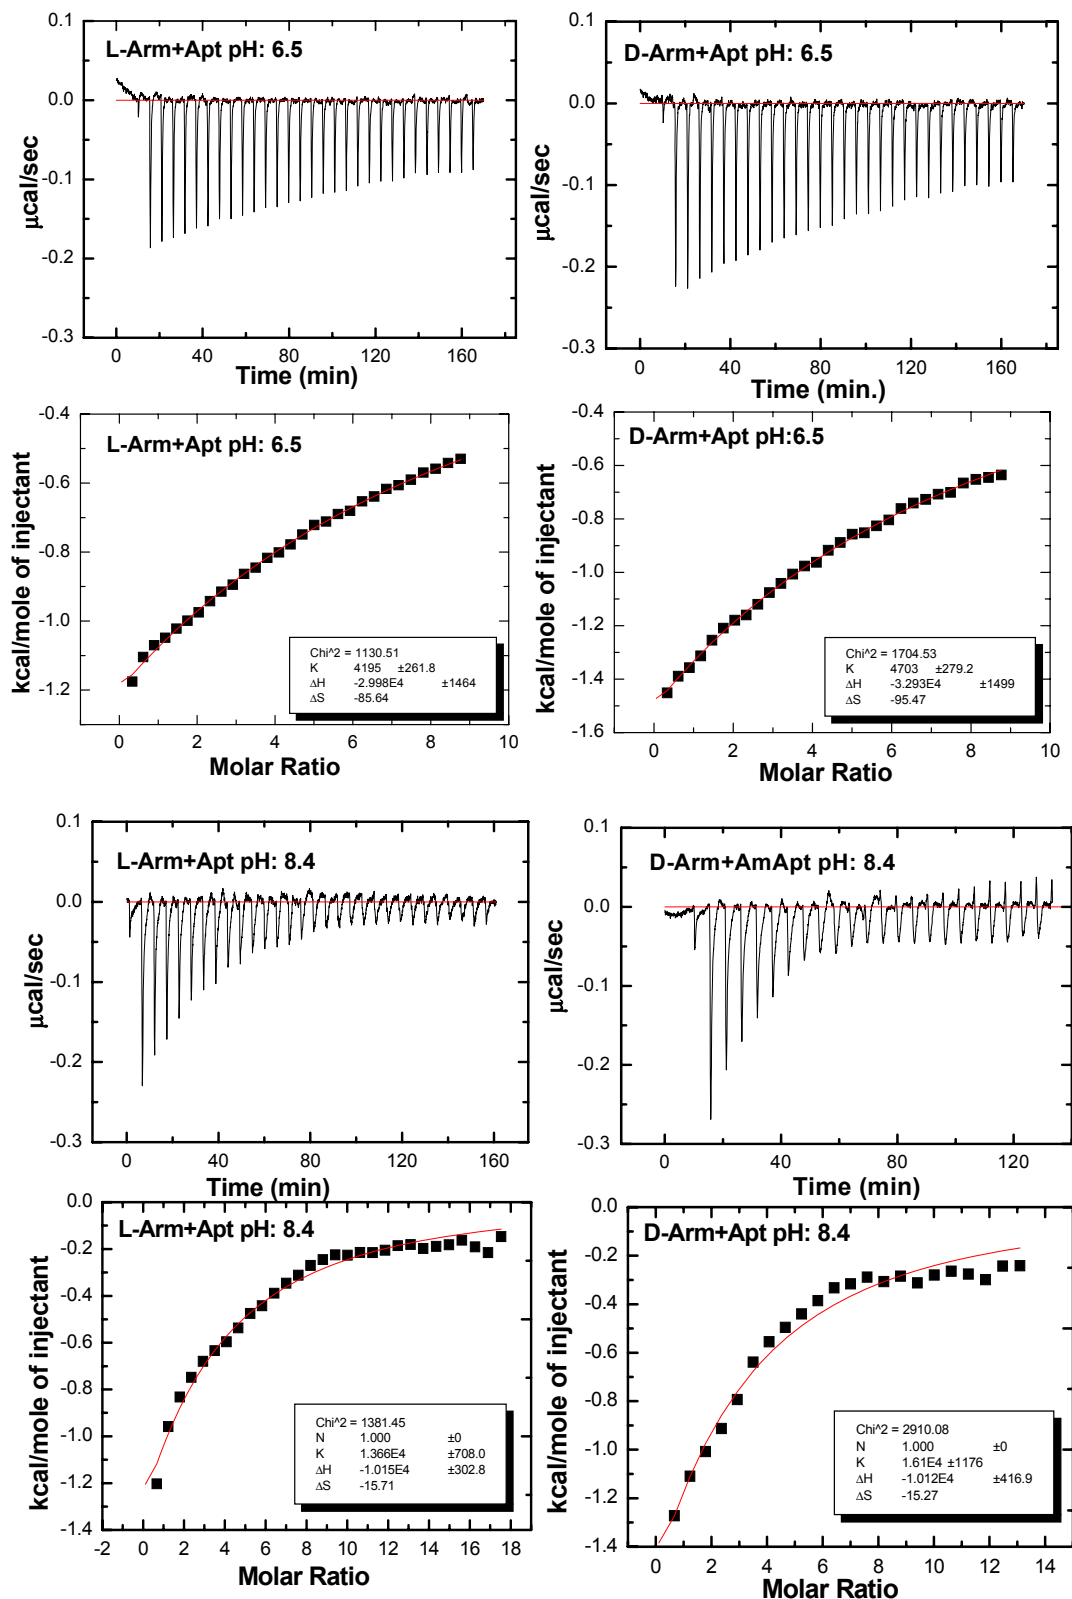

Figure S4. The ITC profiles at 10mM phosphate buffer, 100mM NaCl, pH 6.5 & 8.4 , 20°C (A) L-Arm (B) D-Arm

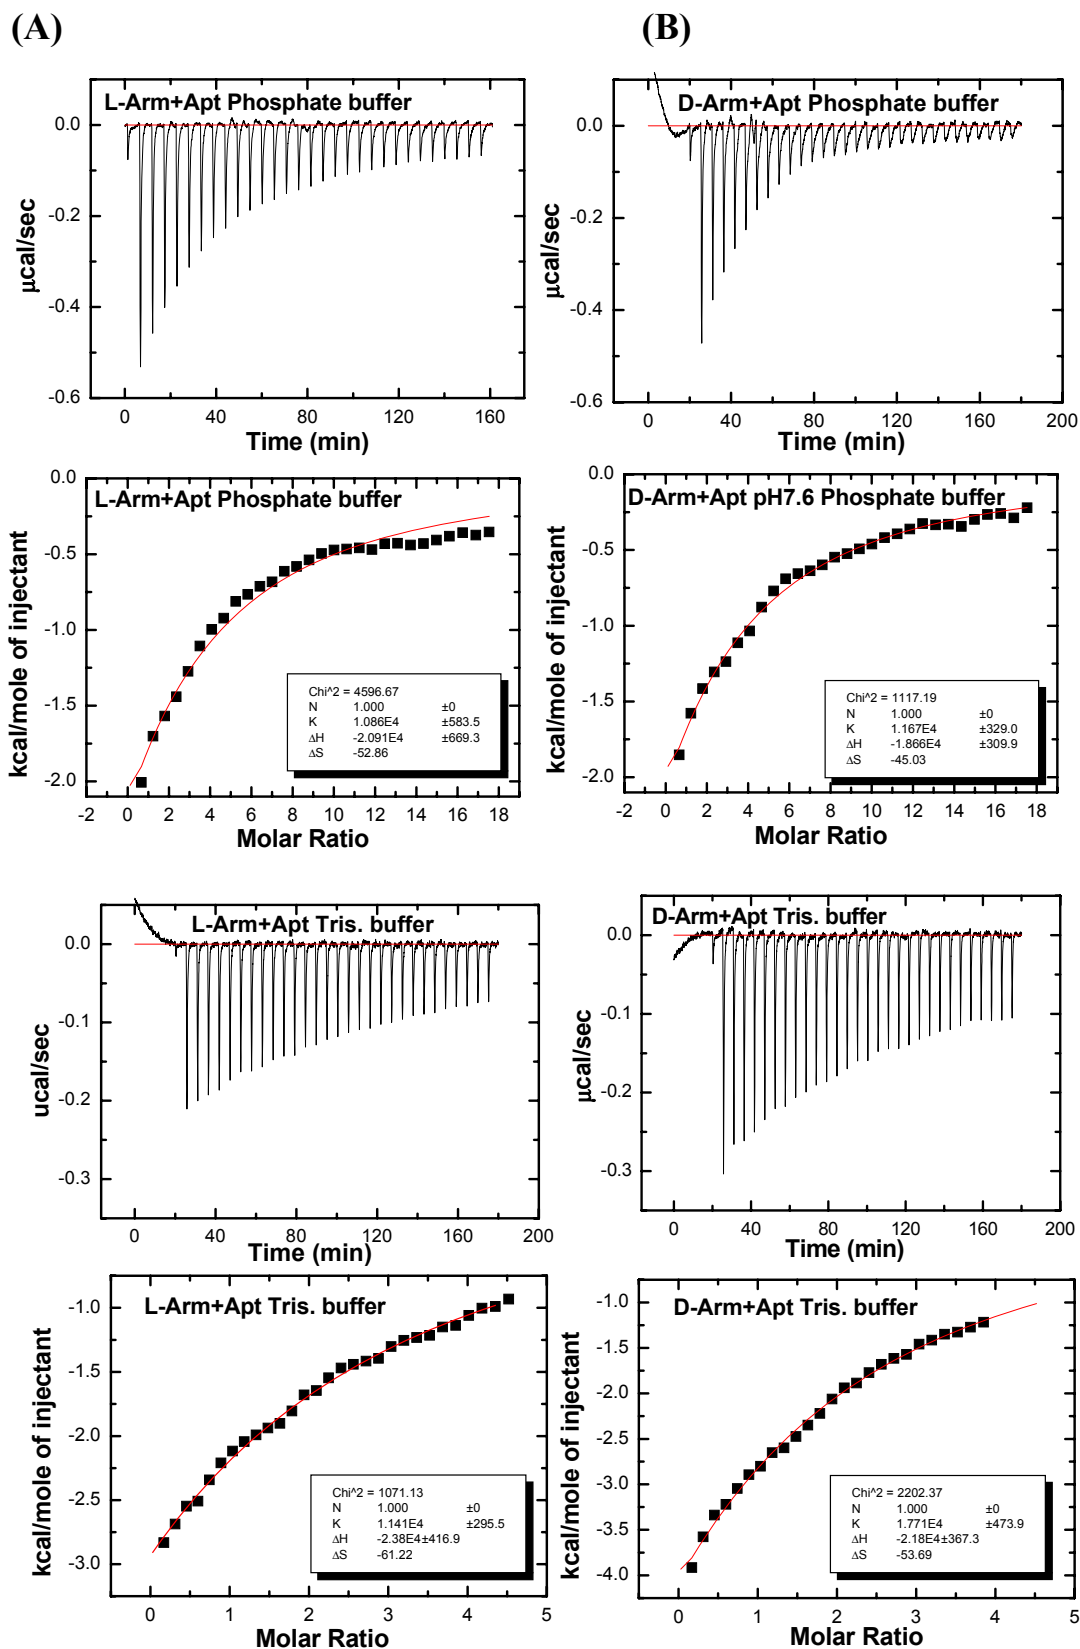

Figure S4. The ITC profiles at 10mM phosphate & Tris buffer, 100mM NaCl, pH 7.6, 20°C (A) L-Arm (B) D-Arm
